# Supplementary material for: Comparative iTRAQ proteomics revealed proteins associated with horn development in yak
Source: Proteome Sci. 2018 Jul 24;16:14. doi: 10.1186/s12953-018-0141-9 (PMC6056918; doi:10.1186/s12953-018-0141-9)
Supplement: Supplementary file 3 — The data on Western blot analysis. (XLS 9 kb) [file 12953_2018_141_MOESM3_ESM.xls]

## Sheet: Additional file 3
Additional file 3. The data on Western blot analysis.
Protein	Area									FABP5/ACTB ratio (mean±SD)
	Horn bud			Polled skin			Frontal skin			Horn bud	Polled skin	Frontal skin
FABP5	773459	802863	613913	197833	228217	224115	143520	188847	246295	1.7309±0.2262	0.4612±0.0159	0.3661±0.0504
ACTB	519988	453458	317336	446627	483317	478360	463079	495594	604727
